# Supplementary material for: The Alaiz Experiment: untangling multi-scale stratified flows overcomplex terrain
Source: Copernicus journal article supplement (doi:10.5194/wes-2020-89), 2020-07-20
Supplement: Supplementary file 1 [file Ztransect_UTM_WGS84.xlsx]

## Sheet: Sheet1
Easting [m]	Northing [m]	Elevation [m asl]
616393	4.73446e+06	809.752
616440	4.73445e+06	812.375
616486	4.73444e+06	814.206
616533	4.73444e+06	816.553
616579	4.73443e+06	817.989
616626	4.73442e+06	819.66
616672	4.73442e+06	821.764
616719	4.73441e+06	824.303
616765	4.7344e+06	824.927
616812	4.73439e+06	824.98
616858	4.73438e+06	825.755
616905	4.73436e+06	832.326
616951	4.73434e+06	837.174
616998	4.73433e+06	840.732
617044	4.73432e+06	843.519
617091	4.73431e+06	845.333
617137	4.73429e+06	848.995
617184	4.73428e+06	852.834
617230	4.73427e+06	855.783
617277	4.73425e+06	859.57
617324	4.73423e+06	859.918
617370	4.73421e+06	859.391
617417	4.73419e+06	861.086
617463	4.73417e+06	861.629
617510	4.73415e+06	861.421
617556	4.73413e+06	865.525
617603	4.73411e+06	867.36
617649	4.73409e+06	869.96
617696	4.73406e+06	871.23
617742	4.73404e+06	874.276
617789	4.73401e+06	876.386
617835	4.73399e+06	877.633
617882	4.73397e+06	877.134
617928	4.73395e+06	879.407
617975	4.73393e+06	881.568
618021	4.7339e+06	883.823
618068	4.73388e+06	884.373
618114	4.73385e+06	883.92
618161	4.73382e+06	883.804
618208	4.7338e+06	880.194
618254	4.73378e+06	879.873
618137	4.73392e+06	868.865
618122	4.73384e+06	883.371
618107	4.73377e+06	842.486
618092	4.7337e+06	797.589
618077	4.73362e+06	769.128
618062	4.73355e+06	743.663
618047	4.73347e+06	722.147
618032	4.7334e+06	701.393
618017	4.73333e+06	680.695
618002	4.73325e+06	659.096
617987	4.73318e+06	644.949
617972	4.73311e+06	636.256
617957	4.73303e+06	633.665
617942	4.73296e+06	626.397
617927	4.73289e+06	618.245
617912	4.73281e+06	612.597
617897	4.73274e+06	609.232
617882	4.73267e+06	607.541
617867	4.73259e+06	607.37
617852	4.73252e+06	607.811
617837	4.73245e+06	609.794
617822	4.73237e+06	608.585
617807	4.7323e+06	613.916
617791	4.73223e+06	614.33
617776	4.73215e+06	610.958
617761	4.73208e+06	608.029
617746	4.73201e+06	604.126
617731	4.73193e+06	602.88
617716	4.73186e+06	603.572
617701	4.73178e+06	604.827
617686	4.73171e+06	601.661
617671	4.73164e+06	606.723
617656	4.73156e+06	609.509
617641	4.73149e+06	606.459
617626	4.73142e+06	603.742
617611	4.73134e+06	603.237
617596	4.73127e+06	601.088
617581	4.7312e+06	601.355
617566	4.73112e+06	604.184
617551	4.73105e+06	609.488
617536	4.73098e+06	611.987
617521	4.7309e+06	611.943
617506	4.73083e+06	610.088
617491	4.73076e+06	609.306
617476	4.73068e+06	608.602
617461	4.73061e+06	607.981
617446	4.73054e+06	606.809
617431	4.73046e+06	605.548
617416	4.73039e+06	605.331
617401	4.73032e+06	600.908
617386	4.73024e+06	607.752
617371	4.73017e+06	623.097
617356	4.73009e+06	625.945
617341	4.73002e+06	635.502
617326	4.72995e+06	648.393
617311	4.72987e+06	664.244
617296	4.7298e+06	685.771
617281	4.72973e+06	719.834
617266	4.72965e+06	762.198
617251	4.72958e+06	803.796
617236	4.72951e+06	842.303
617221	4.72943e+06	883.461
617206	4.72936e+06	910.573
617191	4.72929e+06	927.232
617176	4.72921e+06	947.644
617161	4.72914e+06	971.304
617146	4.72907e+06	989.397
617131	4.72899e+06	1007.17
617116	4.72892e+06	1030.68
617101	4.72885e+06	1053.3
617086	4.72877e+06	1083.05
617071	4.7287e+06	1118.03
617055	4.72863e+06	1141.3
617040	4.72855e+06	1156.73
617025	4.72848e+06	1169.19
617010	4.7284e+06	1177.25
616995	4.72833e+06	1185.07
616980	4.72826e+06	1192.43
616965	4.72818e+06	1200.85
616950	4.72811e+06	1203.7
616935	4.72804e+06	1209.43
616920	4.72796e+06	1216.67
616905	4.72789e+06	1217.2
616890	4.72782e+06	1214.24
616875	4.72774e+06	1209.24
616798	4.72754e+06	1237.92
616845	4.72757e+06	1229.98
616893	4.7276e+06	1228.87
616940	4.72763e+06	1236.34
616988	4.72765e+06	1240.53
617035	4.72767e+06	1242.9
617083	4.72768e+06	1247.44
617131	4.72769e+06	1248.06
617178	4.7277e+06	1244.83
617226	4.72771e+06	1241.65
617273	4.72772e+06	1242.01
617321	4.72773e+06	1244.13
617368	4.72773e+06	1247.24
617416	4.72774e+06	1251.44
617464	4.72774e+06	1252.66
617511	4.72775e+06	1249.6
617559	4.72777e+06	1247.8
617606	4.7278e+06	1248.63
617654	4.72783e+06	1247.22
617701	4.72786e+06	1243.1
617749	4.72786e+06	1246.84
617797	4.72787e+06	1250.57
617844	4.72787e+06	1253.69
617892	4.72787e+06	1257.05
617939	4.72786e+06	1259.04
617987	4.72786e+06	1259.57
618034	4.72787e+06	1258.99
618082	4.72789e+06	1257.09
618130	4.72787e+06	1245.78
618177	4.72788e+06	1244.45
618225	4.72789e+06	1249.64
618272	4.72792e+06	1254.43
618320	4.72793e+06	1254
618367	4.72794e+06	1252.75
618415	4.72794e+06	1253.92
618463	4.72794e+06	1253.53
618510	4.72795e+06	1251.07
618558	4.72798e+06	1242.17
618605	4.72799e+06	1237.42
618653	4.72799e+06	1236.11
618700	4.72799e+06	1220.1
